# Supplementary material for: Molecular Profiling of Thymoma and Thymic Carcinoma: Genetic Differences and Potential Novel Therapeutic Targets
Source: Springer Nature journal article supplement (doi:10.1007/s12253-016-0144-8), 2016-11-14
Supplement: MOESM2 [file 11044566]

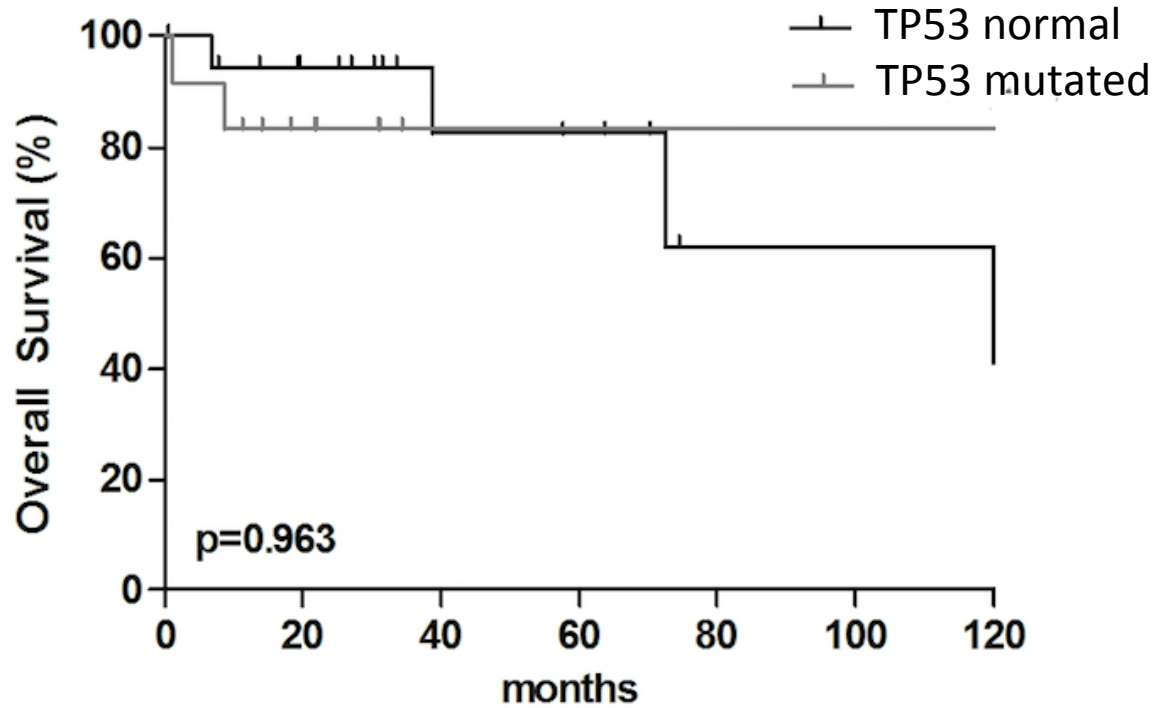

|              |                  |    |   |   |   |   |   |
|--------------|------------------|----|---|---|---|---|---|
| TP53 normal  | 19               | 13 | 7 | 6 | 2 | 2 | 2 |
| TP53 mutated | 12               | 7  | 2 | 2 | 2 | 2 | 2 |
|              | patients at risk |    |   |   |   |   |   |

**Supplementary Fig. 2** Enkner F. *et. al.*
