# Supplementary material for: Molecular Profiling of Thymoma and Thymic Carcinoma: Genetic Differences and Potential Novel Therapeutic Targets
Source: Springer Nature journal article supplement (doi:10.1007/s12253-016-0144-8), 2016-11-14
Supplement: MOESM3 [file 11044566]

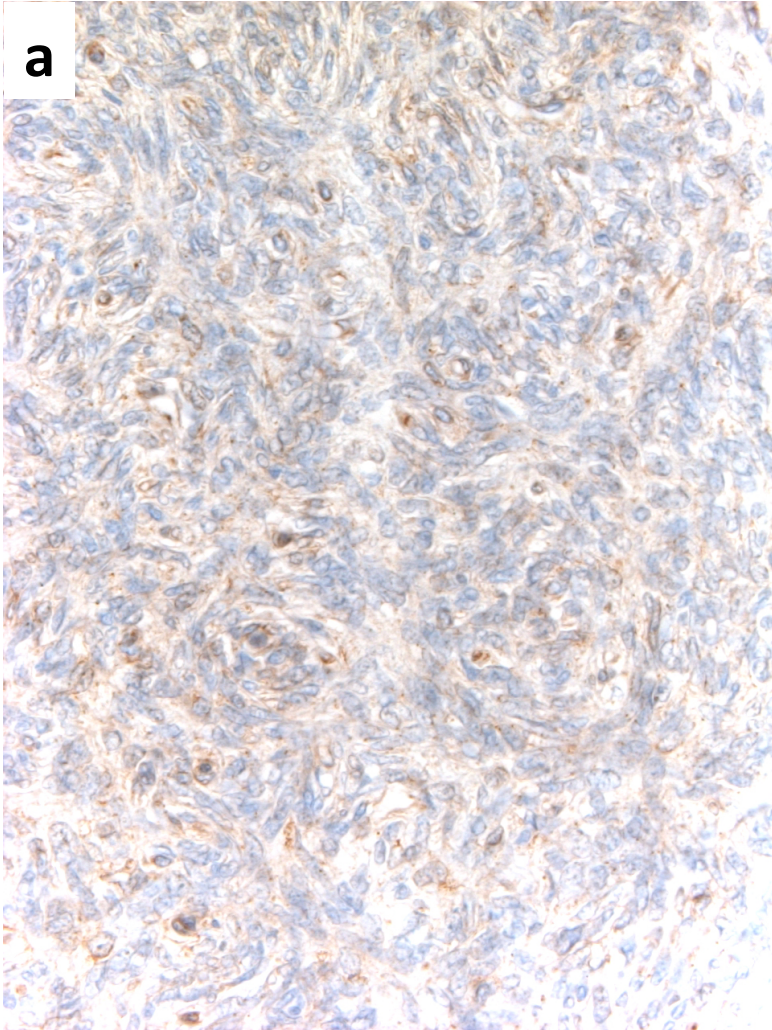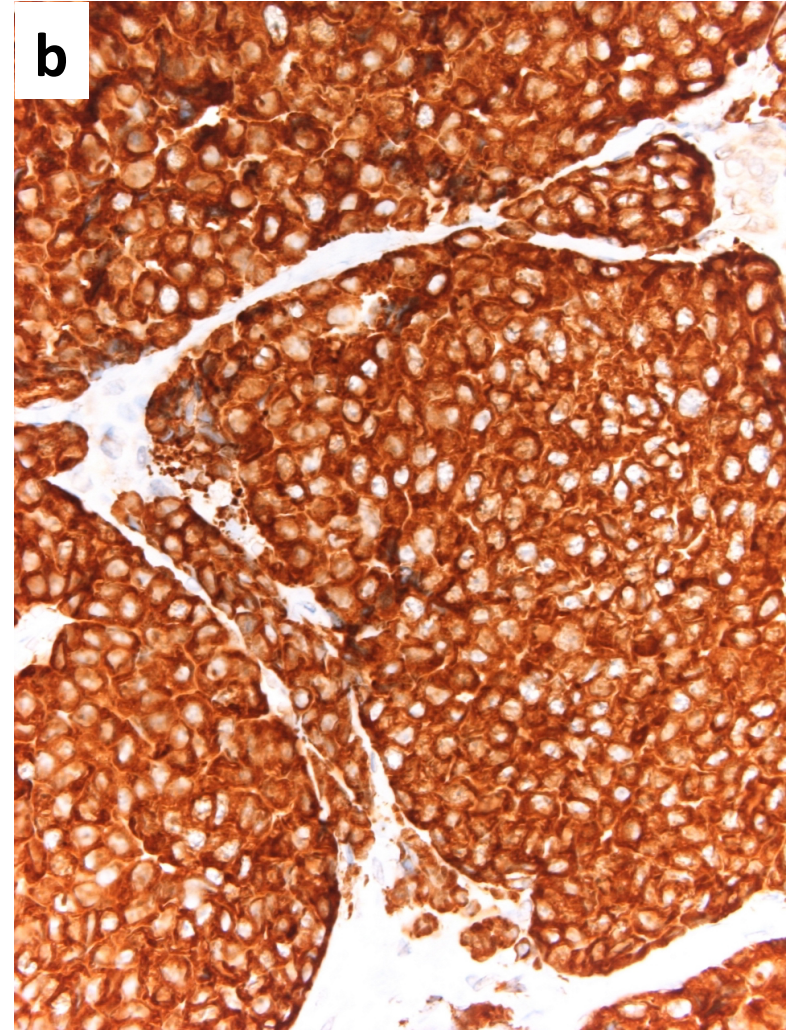

**Supplementary Fig. 3** Enkner F. *et al.*
