# Supplementary material for: Molecular Profiling of Thymoma and Thymic Carcinoma: Genetic Differences and Potential Novel Therapeutic Targets
Source: Springer Nature journal article supplement (doi:10.1007/s12253-016-0144-8), 2016-11-14
Supplement: MOESM5 [file 11044566]

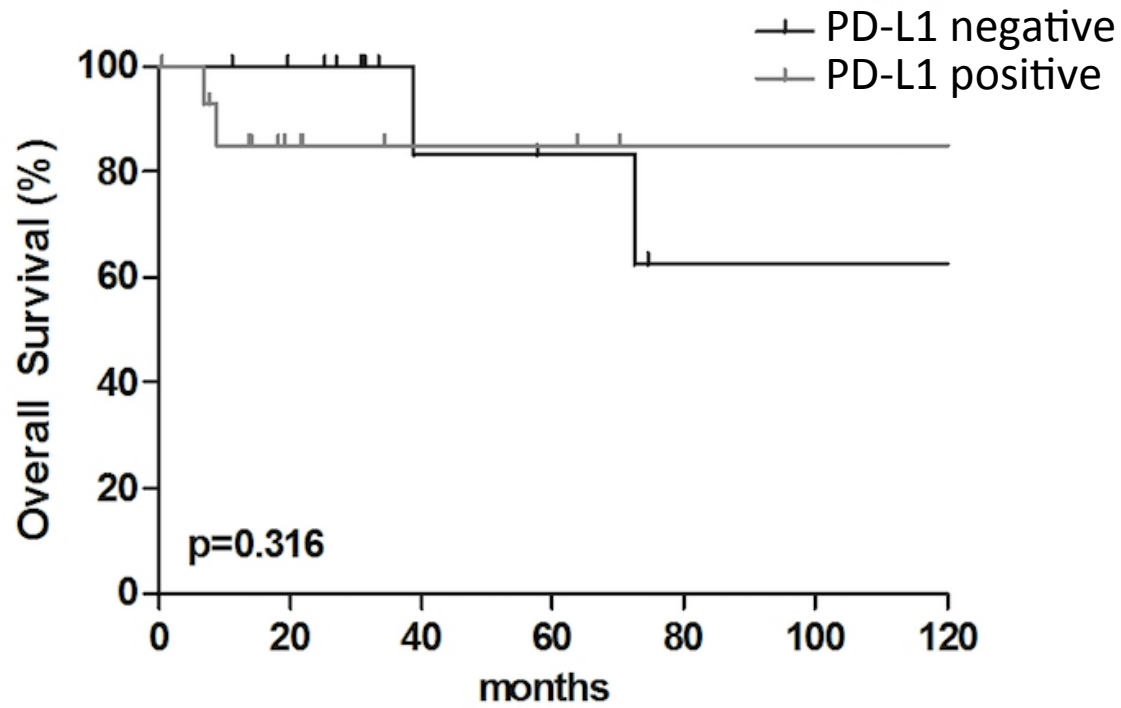

|                |                  |    |   |   |   |   |   |
|----------------|------------------|----|---|---|---|---|---|
| PD-L1 negative | 14               | 12 | 5 | 4 | 2 | 2 | 2 |
| PD-L1 positive | 15               | 7  | 4 | 4 | 2 | 2 | 2 |
|                | patients at risk |    |   |   |   |   |   |

**Supplementary Fig. 5** Enkner F. *et. al.*
