# Supplementary material for: Molecular Profiling of Thymoma and Thymic Carcinoma: Genetic Differences and Potential Novel Therapeutic Targets
Source: Springer Nature journal article supplement (doi:10.1007/s12253-016-0144-8), 2016-11-14
Supplement: MOESM6 [file 11044566]

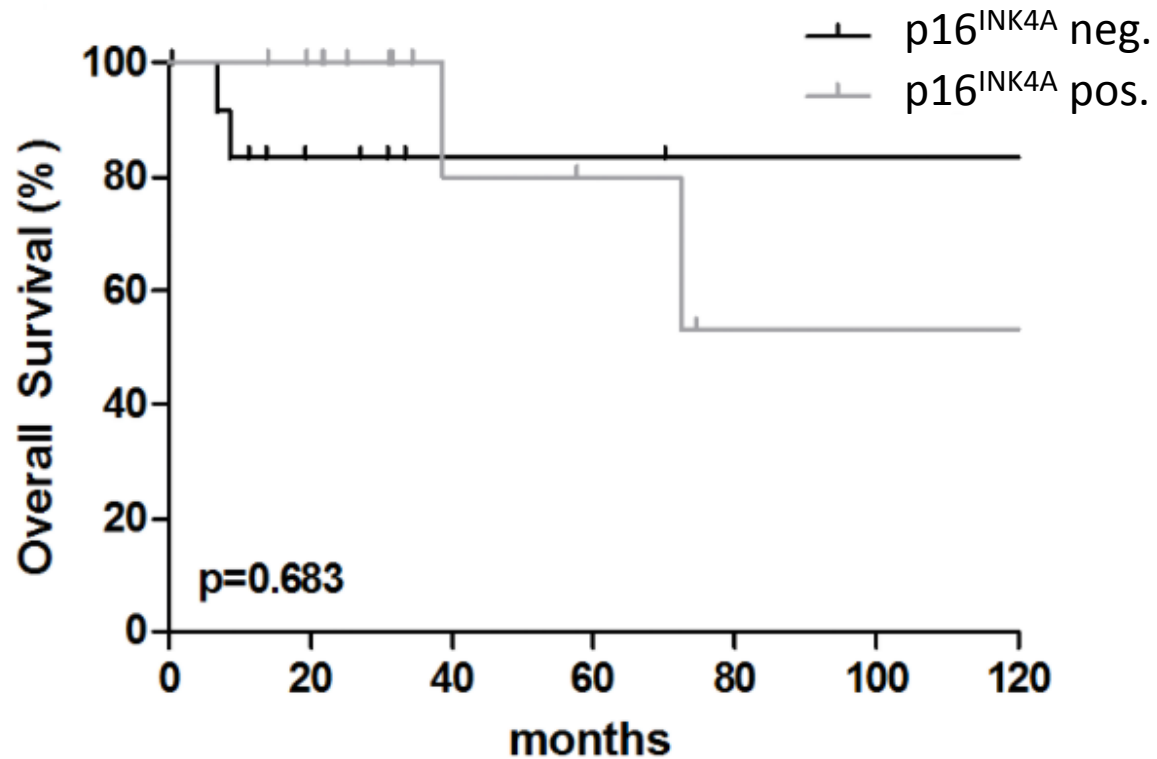

|                           |    |    |   |   |   |   |   |
|---------------------------|----|----|---|---|---|---|---|
| p16 <sup>INK4A</sup> neg. | 13 | 7  | 4 | 4 | 3 | 3 | 3 |
| p16 <sup>INK4A</sup> pos. | 13 | 11 | 4 | 3 | 1 | 1 | 1 |

patients at risk

Supplementary Fig. 6 Enkner F. *et al.*
